# Supplementary material for: The role of the waste sector in the sustainable development goals and the IPCC assessment reports
Source: Springer Nature journal article supplement (doi:10.1007/s00506-024-01034-7), 2024-03-13
Supplement: MOESM2 [file 26856330]

## Supplementary Material 2

Supplementary Material 2 Summary of key words counts and counts of pages in the IPCC assessment reports

| Report | Type of Document         | Landfill- | Dump- | Pages |
|--------|--------------------------|-----------|-------|-------|
| FAR    | Summary for Policymakers | 7         | 0     | 87    |
|        | WG I Report              | 5         | 0     | 414   |
|        | WG II Report             | 1         | 1     | 296   |
|        | WG III Report            | 36        | 0     | 332   |
| SAR    | Summary for Policymakers | 1         | 1     | 36    |
|        | WG I Report              | 1         | 0     | 588   |
|        | WG II Report             | 36        | 10    | 891   |
|        | WG III Report            | 14        | 2     | 438   |
| TAR    | Summary for Policymakers | 0         | 0     | 34    |
|        | WG I Report              | 2         | 0     | 893   |
|        | WG II Report             | 1         | 2     | 1042  |
|        | WG III Report            | 92        | 12    | 754   |
| AR4    | Summary for Policymakers | 1         | 0     | 22    |
|        | WG I Report              | 1         | 0     | 1007  |
|        | WG II Report             | 1         | 1     | 987   |
|        | WG III Report            | 482       | 15    | 863   |
| AR5    | Summary for Policymakers | 0         | 0     | 32    |
|        | WG I Report              | 11        | 0     | 1552  |
|        | WG II Report             | 6         | 2     | 1846  |
|        | WG III Report            | 95        | 7     | 1454  |
| AR6    | Summary for Policymakers | 0         | 0     | 42    |
|        | WG I Report              | 15        | 0     | 3908  |
|        | WG II Report             | 9         | 2     | 3068  |
|        | WG III Report            | 18        | 10    | 2042  |
